# Supplementary material for: Sensory-Guided Isolation, Identification, and Active Site Calculation of Novel Umami Peptides from Ethanol Precipitation Fractions of Fermented Grain Wine (Huangjiu)
Source: MDPI journal article supplement (doi:10.3390/foods12183398), 2023-09-11

## Supplementary Tables and Figures

**Table S1. Umami prediction and docking screening results of 75%ETP water eluted fraction peptides by macroporous resin**

| Serial | Peptide    | Affinity<br>(kca/mol) |       | UMPred-<br>FRL | UmamiDB | Intensity | Mass<br>(Da) |
|--------|------------|-----------------------|-------|----------------|---------|-----------|--------------|
|        | Sequence   | T1R1                  | T1R3  | Score          | Score   |           |              |
| 1      | DTYNPR     | -11.0                 | -10.1 | 0.641          | 0.991   | 49703000  | 750.33       |
| 2      | SYNPR      | -10.6                 | -9.1  | 0.949          | 0.877   | 148890000 | 635.30       |
| 3      | TYNPR      | -10.8                 | -9.5  | 0.984          | 0.983   | 109380000 | 649.31       |
| 4      | FRDEHQ     | -10.0                 | -9.9  | 0.603          | 0.982   | 268490000 | 830.37       |
| 5      | TYNPK      | -10.0                 | -8.9  | 0.572          | 0.912   | 6808700   | 621.31       |
| 6      | RFRQGD     | -9.9                  | -8.9  | 0.800          | 0.985   | 8428200   | 777.39       |
| 7      | KHHDRPG    | -9.8                  | -9.4  | 0.874          | 0.934   | 338970    | 845.42       |
| 8      | NFHHGD     | -9.7                  | -9.7  | 0.866          | 0.895   | 307450000 | 725.29       |
| 9      | ENFHHGD    | -9.6                  | -10.0 | 0.618          | 0.896   | 3848100   | 854.33       |
| 10     | FHHGD      | -9.6                  | -9.1  | 0.935          | 0.759   | 93945000  | 611.24       |
| 11     | FRDEH      | -9.6                  | -9.9  | 0.578          | 0.843   | 485570000 | 702.31       |
| 12     | FHTGDRG    | -9.3                  | -10.0 | 0.809          | 0.829   | 3713000   | 788.35       |
| 13     | LTESQSQSH  | -9.1                  | -9.4  | 0.507          | 0.995   | 779040    | 1015.45      |
| 14     | TVDGPSH    | -9.1                  | -9.9  | 0.545          | 0.768   | 23113000  | 711.32       |
| 15     | VVGVDNH    | -9.1                  | -9.0  | 0.737          | 0.504   | 1225500   | 623.34       |
| 16     | LAGNKRNP   | -8.5                  | -9.3  | 0.814          | 0.972   | 5046900   | 868.49       |
| 17     | EGLERELEK  | -8.2                  | -8.4  | 0.879          | 0.604   | 1881500   | 1101.56      |
| 18     | KDEH       | -8.2                  | -7.8  | 0.947          | 0.986   | 1351800   | 802.40       |
| 19     | KKRGDTKDH  | -7.8                  | -9.0  | 0.960          | 0.986   | 31852     | 1083.58      |
| 20     | DNSSTISTHD | -7.7                  | -8.7  | 0.916          | 0.609   | 875960    | 1075.44      |
| 21     | SIEQHSSQN  | -7.4                  | -9.5  | 0.596          | 0.609   | 6691900   | 1028.45      |
| 22     | SSIEQHSSQN | -7.4                  | -9.2  | 0.717          | 0.609   | 1225300   | 1115.48      |

**Figure S1. Ramachandran plot of the modeled umami receptor T1R1/T1R3**

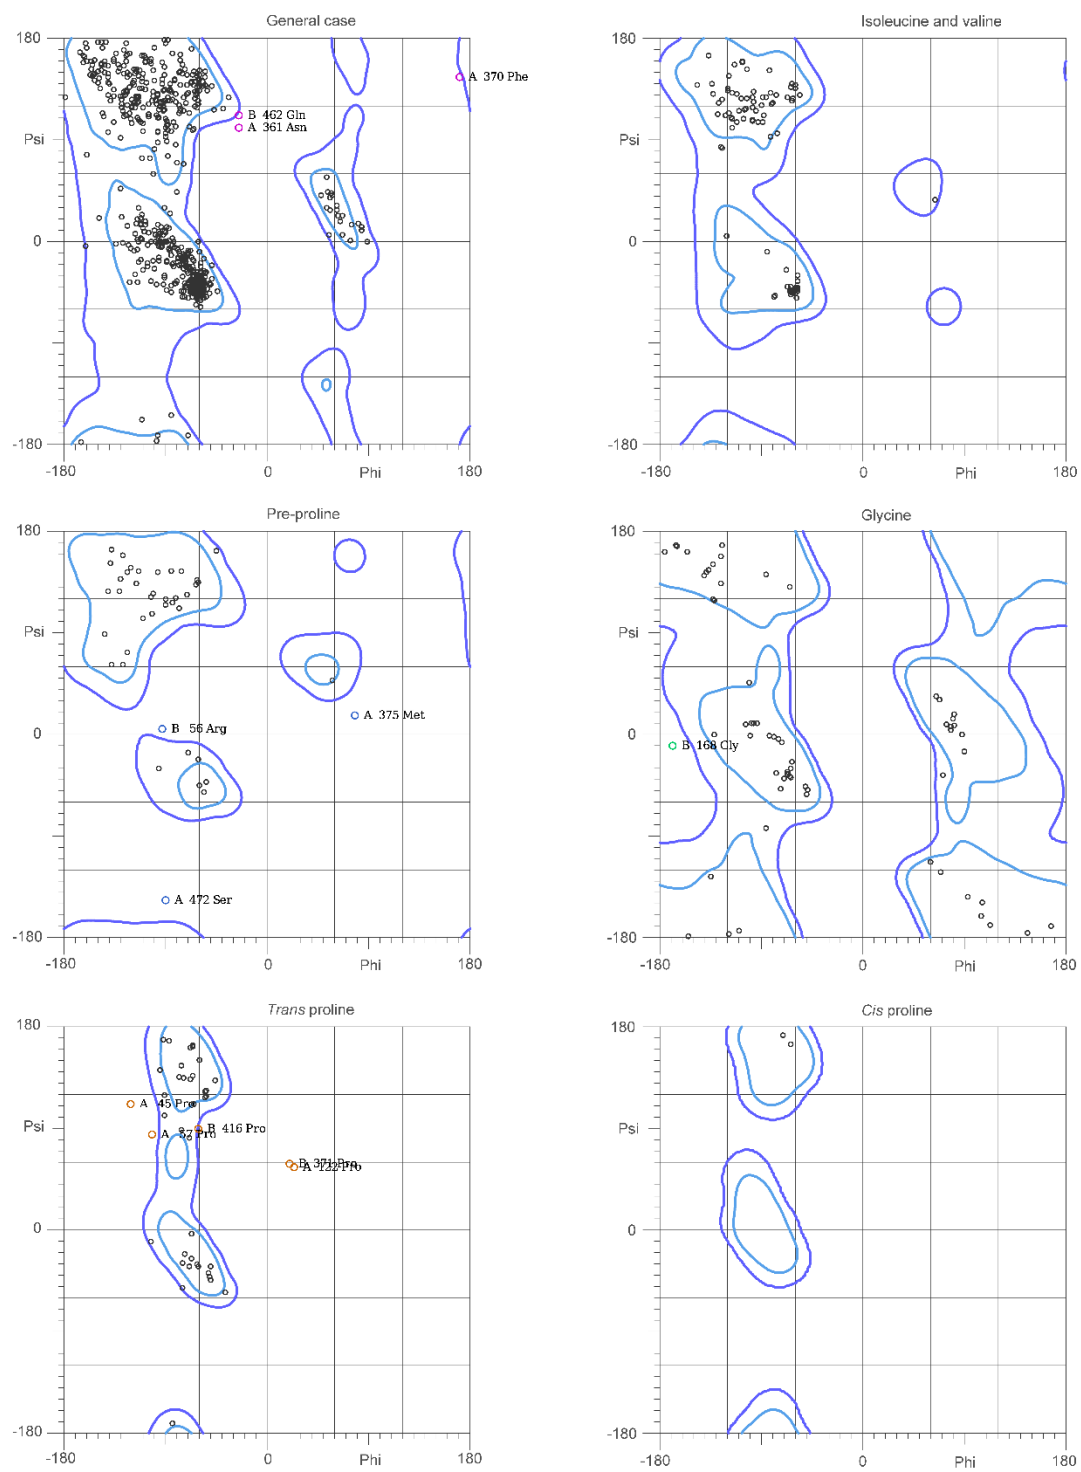

**Figure S2. The docking residues interaction mode between umami peptides and T1R1-T1R3 receptor.**

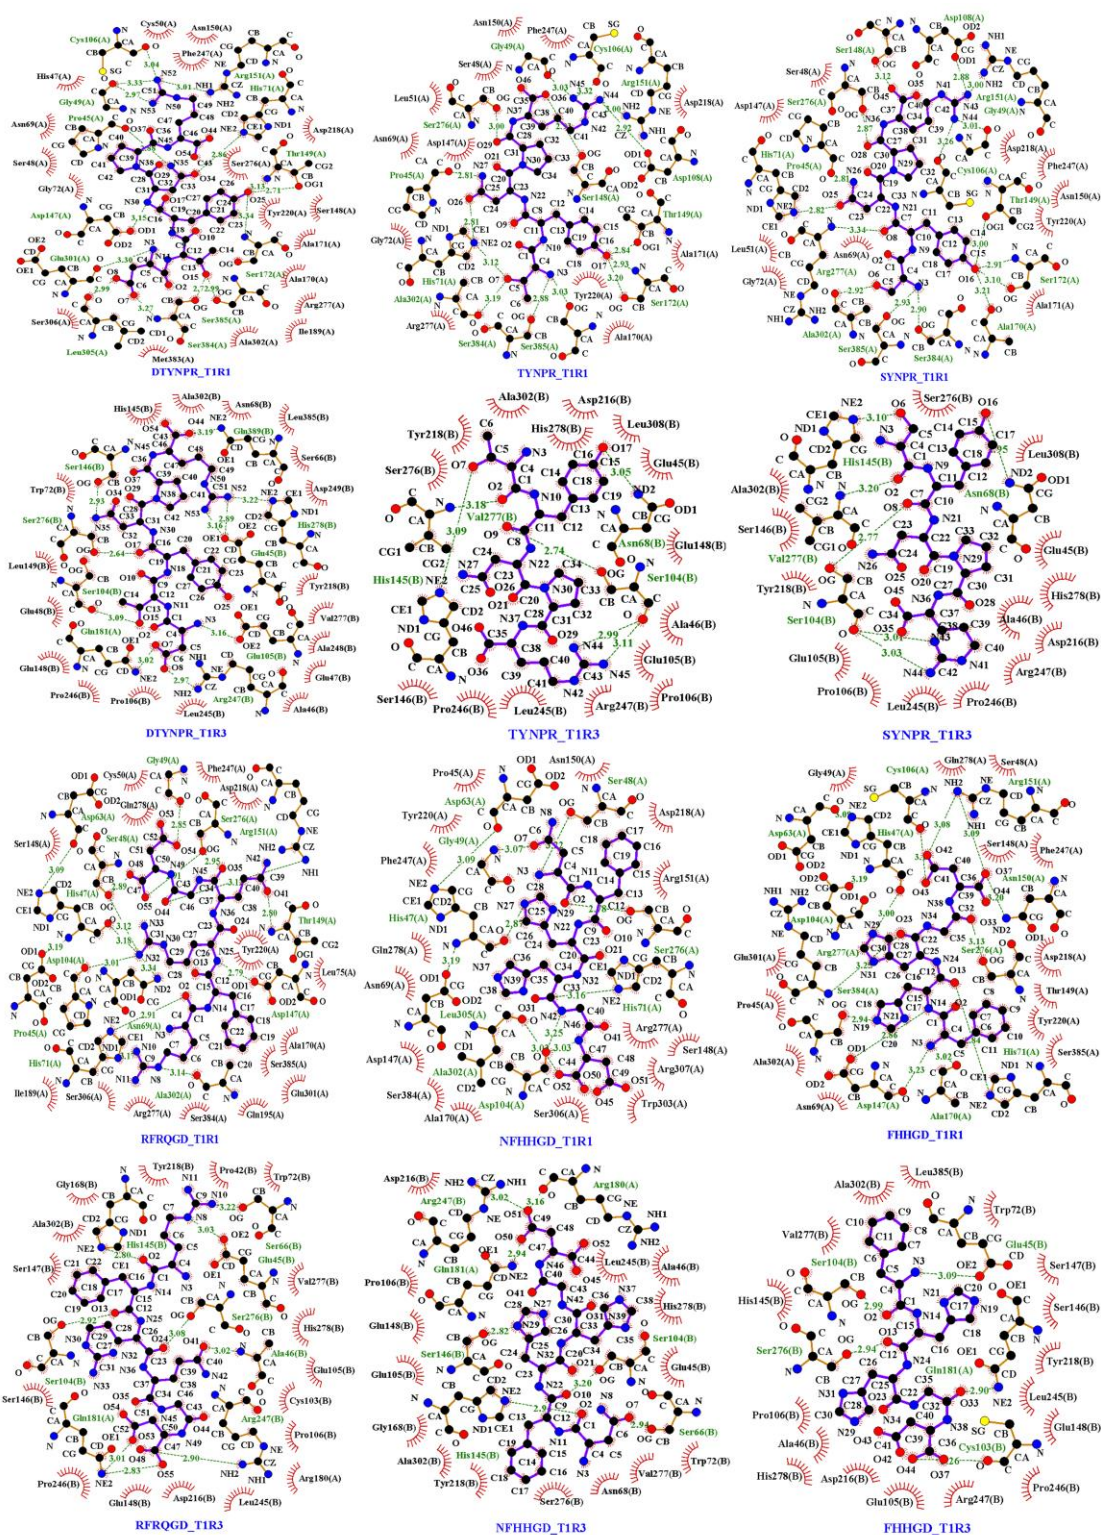

Supplement: s1 [file s1]
